# Supplementary material
Source: MDPI journal article supplement (https://www.mdpi.com/1424-2818/9/4/44)
Supplement: s1 [file s1]

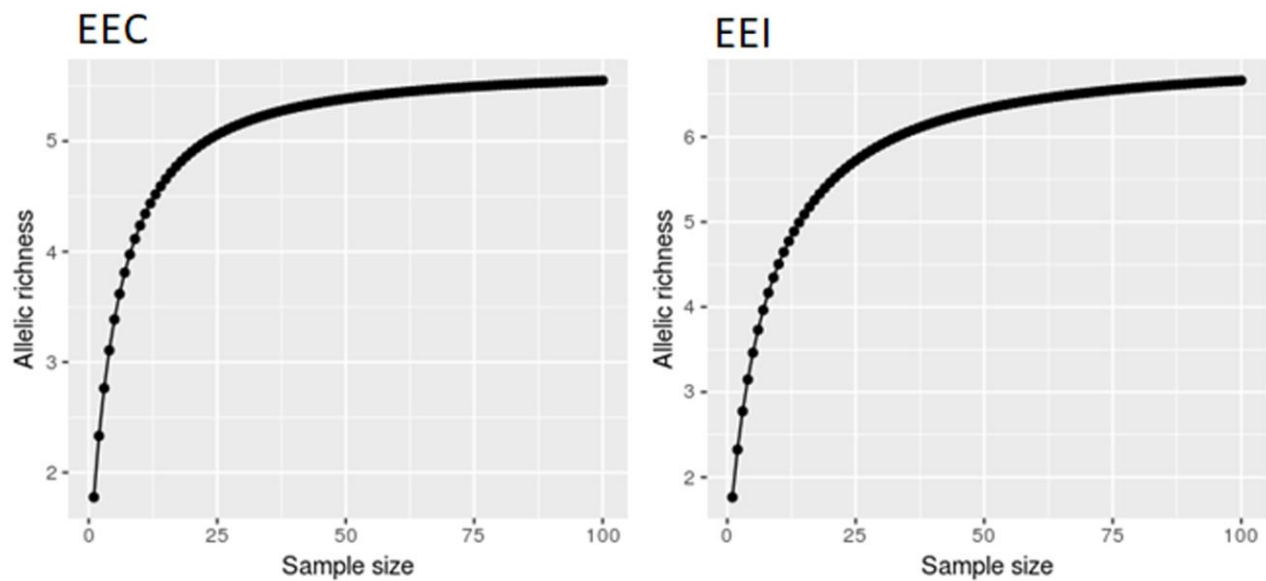

**Figure S1.** Rarefaction analysis of Allelic richness values for a simulated population up to 100 individuals.
