# Supplementary material
Source: MDPI journal article supplement (https://www.mdpi.com/1424-2818/9/4/44)
Supplement: s1 [file s1]

**Table S2:** False Allele and Allelic Dropout rates.

|          | Locus |       |       |       |      |       |      |         |
|----------|-------|-------|-------|-------|------|-------|------|---------|
|          | A208  | A216  | A339  | B003  | B010 | B210  | C108 | Overall |
| FA.Rate  | 2.22  | 2.70  | 4.91  | 4.52  | 3.55 | 3.39  | 0.57 | 3.13    |
| ADO.Rate | 12.22 | 20.00 | 11.04 | 20.60 | 5.92 | 18.08 | 8.00 | 13.94   |

FA: False Allele. ADO: Allelic Dropout
