# Supplementary material
Source: MDPI journal article supplement (https://www.mdpi.com/1424-2818/9/4/44)
Supplement: s1 [file s1]

**Table S1:** Relatedness values ( $r$ ) for pairs of individuals in both areas.

| Individual | EEI1 | EEI2 | EEI3 | EEI4 | EEI5 | EEI6 | EEI7 | EEI8 | EEI9 | EEI10 | EEC1 | EEC2 | EEC3 | EEC4 | EEC5 | EEC6 |
|------------|------|------|------|------|------|------|------|------|------|-------|------|------|------|------|------|------|
| EEI1       | 1.00 |      |      |      |      |      |      |      |      |       |      |      |      |      |      |      |
| EEI2       | 0.50 | 1.00 |      |      |      |      |      |      |      |       |      |      |      |      |      |      |
| EEI3       | 0.00 | 0.00 | 1.00 |      |      |      |      |      |      |       |      |      |      |      |      |      |
| EEI4       | 0.00 | 0.00 | 0.10 | 1.00 |      |      |      |      |      |       |      |      |      |      |      |      |
| EEI5       | 0.26 | 0.04 | 0.00 | 0.00 | 1.00 |      |      |      |      |       |      |      |      |      |      |      |
| EEI6       | 0.09 | 0.00 | 0.09 | 0.33 | 0.00 | 1.00 |      |      |      |       |      |      |      |      |      |      |
| EEI7       | 0.00 | 0.02 | 0.50 | 0.24 | 0.09 | 0.00 | 1.00 |      |      |       |      |      |      |      |      |      |
| EEI8       | 0.20 | 0.15 | 0.00 | 0.00 | 0.00 | 0.00 | 0.11 | 1.00 |      |       |      |      |      |      |      |      |
| EEI9       | 0.00 | 0.00 | 0.12 | 0.14 | 0.00 | 0.00 | 0.22 | 0.15 | 1.00 |       |      |      |      |      |      |      |
| EEI10      | 0.00 | 0.09 | 0.00 | 0.00 | 0.00 | 0.01 | 0.00 | 0.00 | 0.00 | 1.00  |      |      |      |      |      |      |
| EEC1       | 0.00 | 0.06 | 0.00 | 0.00 | 0.00 | 0.00 | 0.00 | 0.00 | 0.00 | 0.00  | 1.00 |      |      |      |      |      |
| EEC2       | 0.00 | 0.09 | 0.00 | 0.00 | 0.00 | 0.00 | 0.00 | 0.00 | 0.00 | 0.00  | 0.00 | 1.00 |      |      |      |      |
| EEC3       | 0.00 | 0.00 | 0.00 | 0.00 | 0.00 | 0.00 | 0.00 | 0.00 | 0.00 | 0.00  | 0.00 | 0.00 | 1.00 |      |      |      |
| EEC4       | 0.00 | 0.00 | 0.00 | 0.19 | 0.00 | 0.19 | 0.00 | 0.00 | 0.00 | 0.00  | 0.15 | 0.19 | 0.12 | 1.00 |      |      |
| EEC5       | 0.00 | 0.00 | 0.00 | 0.00 | 0.00 | 0.00 | 0.00 | 0.00 | 0.00 | 0.00  | 0.00 | 0.00 | 0.15 | 0.15 | 1.00 |      |
| EEC6       | 0.00 | 0.00 | 0.00 | 0.00 | 0.17 | 0.00 | 0.00 | 0.00 | 0.00 | 0.00  | 0.04 | 0.00 | 0.25 | 0.18 | 0.00 | 1.00 |

EEC: Individuals from Estação Ecológica dos Caetetus. EEI: Individuals from Estação Ecológica de Itirapina
